# Supplementary material
Source: Springer Nature journal article supplement (https://www.springermedizin.de/resource/supplementary/12985_2014_2480_MOESM1_ESM.pdf/9606828)

Donkey --- M G D H R L L R W - L L L **---** - - - V V V V V V V F - L L V T T I I F A  
 Horse --- M G D H R L L R W - L L L **VV** - **V** V V V V V V F - L L V T T I I F A  
 Cat --- M V P G R S L G W - Q R W L G - G F L I L A V L G L S V A L V I F V  
 Macaca M A P I L Y D Y C K M P M D D I W K E D G D K R C K - - L V I G I L G L L V I V L L G V L L I F F I  
 Human M A S T S Y D Y C R V P M E - - - - - D G D K R C K L L L G I G I L V L L I I V I L G V P L I I F T

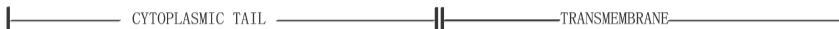

Donkey V Q A N S K A C K D G L R A E Q E C R N G T H F L E H Q L R R A Q E V L **Q** G T E T Q A A I C N Q T V  
 Horse V Q A N S K A C K D G L R A E Q E C R N G T H F L E H Q L R R A Q E V L **R** G T E T Q A A I C N Q T V  
 Cat V K A N S K A C K D G L L A E E E C H G V T R L L E V R L T Q A W E G L L R N E V Q A A T C N E T L  
 Macaca I K A N S E A C Q D G L R A V M E C R N V T Y L L Q Q E L A E A Q R G F R D A E A Q A V T C N Q T V  
 Human I K A N S E A C R D G L R A V M E C R N V T H L L Q Q E L T E A Q K G F Q D V E A Q A A T C N H T V

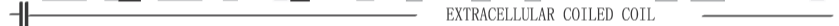

Donkey V T L R A S L E M A K A D **S** R E Q L A R V Q E L E G **E** T A A L K Q Q L Q N A L A E V E R L R Q R N D  
 Horse V T L R A S L E M A K A D **R** R E Q L A R V Q E L E G **D** T A A L K Q Q L Q N A L A E V E R L R Q R N D  
 Cat V T L L A S L E M E K A Q S Q E W L A K G K E L R G E I E E L K H K L Q N A S V E V E R L R K G T E  
 Macaca M A L M A S L D A E K A Q G R K - - - K V E E L E G E I T T L N H K L Q D A S A E V E R L R R E N H  
 Human M A L M A S L D A E K A Q G Q K - - - K V E E L E G E I T T L N H K L Q D A S A E V E R L R R E N Q

Donkey G A S G - - - G N - N D P A **S** S A N A L S P L V A A V F L P L G L W D L Q A  
 Horse G A S G - - - G N - N D P A **S** S A N A L S P L V A A V F L P L G L W D L Q A  
 Cat T S S K - - - K K E V A S A S **S** L K A L S P L V V S V H L L L A F V A L L A  
 Macaca V L N A R I A D T D S - A S P Q D **S** S C A A E P P L L I L L L G L S A L L L  
 Human V L S V R I A D K K Y Y P S S Q D **S** S S A A A P Q L L I V L L G L S A L L Q

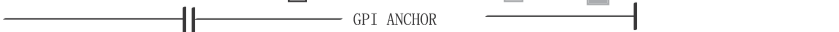

Supplement: MOESM1 [file 9606828]
